# Supplementary material for: Virulence Genes and In Vitro Antibiotic Profile of Photobacterium damselae Strains, Isolated from Fish Reared in Greek Aquaculture Facilities
Source: MDPI journal article supplement (doi:10.3390/ani12223133), 2022-11-14
Supplement: s1 [file s1]

>120

GTAATGGCTCACCAAGGCAACGATCCCTAGCTGGTCTGAGAGGATGATCAGCCACAC  
TGGAAGTCTGAGACACGGTCCAGACTCCTACGGGAGGCAGCAGTGGGGAATATTGCACA  
ATGGGGGAAACCCTGATGCAGCCATGCCGCGTGTGTGAAGAAGGCCTTCGGGTTGTA  
AAGCACTTTTCAGTAGGGAGGAAGGTAGTGTAGTTAACACCTGCACTATTTGACGTTA  
CCTACAGAAGAAGCACCGGCTAACTCCGTGCCAGCAGCCGCGGTAATACGGAGGGTG  
CGAGCGTTAATCGGAATTACTGGGCGTAAAGCGCATGCAGGCGGCCTGTTAAGTCAG  
ATGTGAAAGCCCGGGGCTTAACCTCGGAATTGCATTTGAAACTGGCAGGCTAGAGTC  
TTGTAGAGGGGGGTAGAATTTTCAGGTGTAGCGGTGAAATGCGTAGAGATCTGAAGGA  
ATACCAGTGGCGAAGGCGGCCCCCTGGACAAAGACTGACGCTCAGATGCGAAAGCGT  
GGGGAGCAAACAGGATTAGATACCCTGGTAGTCCACGCGGTAAACGATGTCTACTTG  
GAGGTTGTGGCCTTGAGCCGTGGCTTTCGGAGCTAACGCGTTAAGTAGACCGCCTGG  
GGAGTACGGTCGCAAGATTA AAACTCAAATGAATTGACGGGGGCCCCGCACAAGCGGT  
GGAGCATGTGGTTTAATTCGATGCAACGCGAAGAACCTTACCTACTCTTGACATCCA  
GAGAAGCTTGAAGAGATTTCGAGTGTGCCTTCGGGAACTCTGAGACAGGTGCTGCATG  
GCTGTCTGTCAGCTCGTGTGTGAAATGTTGGGTAAAGTCCCGCAACGAGCGCAACCCT  
TATCCTTGTTTTGCCAGCACTTCGGGTGGGAACTCCAGGGAGACTGCCGGTGATAAAC  
CGGAGGAAGGTGGGGACGACGTCAAGTCATCATGGCCCTTACGAGTAGGGCTACACA  
CGTGCTACAATGGC

>214

GTAATGGCTCACCAAGGCAACGATCCCTAGCTGGTCTGAGAGGATGATCAGCCACAC  
TGGAAGTCTGAGACACGGTCCAGACTCCTACGGGAGGCAGCAGTGGGGAATATTGCACA  
ATGGGGGAAACCCTGATGCAGCCATGCCGCGTGTGTGAAGAAGGCCTTCGGGTTGTA  
AAGCACTTTTCAGTAGGGAGGAAGGTAGTGTAGTTAACACCTGCACTATTTGACGTTA  
CCTACAGAAGAAGCACCGGCTAACTCCGTGCCAGCAGCCGCGGTAATACGGAGGGTG  
CGAGCGTTAATCGGAATTACTGGGCGTAAAGCGCATGCAGGCGGCCTGTTAAGTCAG  
ATGTGAAAGCCCGGGGCTTAACCTCGGAATTGCATTTGAAACTGGCAGGCTAGAGTC  
TTGTAGAGGGGGGTAGAATTTTCAGGTGTAGCGGTGAAATGCGTAGAGATCTGAAGGA  
ATACCAGTGGCGAAGGCGGCCCCCTGGACAAAGACTGACGCTCAGATGCGAAAGCGT  
GGGGAGCAAACAGGATTAGATACCCTGGTAGTCCACGCGGTAAACGATGTCTACTTG  
GAGGTTGTGGCCTTGAGCCGTGGCTTTCGGAGCTAACGCGTTAAGTAGACCGCCTGG  
GGAGTACGGTCGCAAGATTA AAACTCAAATGAATTGACGGGGGCCCCGCACAAGCGGT  
GGAGCATGTGGTTTAATTCGATGCAACGCGAAGAACCTTACCTACTCTTGACATCCA  
GAGAAGCTTGAAGAGATTTCGAGTGTGCCTTCGGGAACTCTGAGACAGGTGCTGCATG  
GCTGTCTGTCAGCTCGTGTGTGAAATGTTGGGTAAAGTCCCGCAACGAGCGCAACCCT  
TATCCTTGTTTTGCCAGCACTTCGGGTGGGAACTCCAGGGAGACTGCCGGTGATAAAC  
CGGAGGAAGGTGGGGACGACGTCAAGTCATCATGGCCCTTACGAGTAGGGCTACACA  
CGTGCTACAATGGC

>222

GTAATGGCTCACCAAGGCAACGATCCCTAGCTGGTCTGAGAGGATGATCAGCCACAC  
TGGAAGTCTGAGACACGGTCCAGACTCCTACGGGAGGCAGCAGTGGGGAATATTGCACA  
ATGGGGGAAACCCTGATGCAGCCATGCCGCGTGTGTGAAGAAGGCCTTCGGGTTGTA  
AAGCACTTTTCAGTAGGGAGGAAGGTAGTGTAGTTAACACCTGCACTATTTGACGTTA  
CCTACAGAAGAAGCACCGGCTAACTCCGTGCCAGCAGCCGCGGTAATACGGAGGGTG

CGAGCGTTAATCGGAATTACTGGGCGTAAAGCGCATGCAGGCGGCCTGTAAAGTCAG  
ATGTGAAAGCCCGGGGCTTAACCTCGGAATTGCATTTGAAACTGGCAGGCTAGAGTC  
TTGTAGAGGGGGGTAGAATTTACAGGTGTAGCGGTGAAATGCGTAGAGATCTGAAGGA  
ATACCAGTGGCGAAGGCGGCCCCCTGGACAAAGACTGACGCTCAGATGCGAAAGCGT  
GGGGAGCAAACAGGATTAGATACCCTGGTAGTCCACGCCGTAAACGATGTCTACTTG  
GAGGTTGTGGCCTTGAGCCGTGGCTTTCGGAGCTAACGCGTTAAGTAGACCGCCTGG  
GGAGTACGGTCGCAAGATTAAAACTCAAATGAATTGACGGGGGGCCGCACAAGCGGT  
GGAGCATGTGGTTTAATTTCGATGCAACGCGAAGAACCTTACCTACTCTTGACATCCA  
GAGAAGCTTGAAGAGATTTCGAGTGTGCCTTCGGGAACTCTGAGACAGGTGCTGCATG  
GCTGTCTCAGCTCGTGTGTGAAATGTTGGGTAAAGTCCCGCAACGAGCGCAACCCT  
TATCCTTGTTTGGCAGCACTTCGGGTGGGAACTCCAGGGAGACTGCCGGTGATAAAC  
CGGAGGAAGGTGGGGACGACGTCAAGTCATCATGGCCCTTACGAGTAGGGCTACACA  
CGTGCTACAATGGC

>228

GTAATGGCTCACCAAGGCAACGATCCCTAGCTGGTCTGAGAGGATGATCAGCCACAC  
TGGAAGTGAACACGGTCCAGACTCCTACGGGAGGCAGCAGTGGGGAATATTGCACA  
ATGGGGGAAACCCTGATGCAGCCATGCCGCGTGTGTGAAGAAGGCCTTCGGGTGTGA  
AAGCACTTTCAGTAGGGAGGAAGGTAGTGTAGTTAACACCTGCACTATTTGACGTTA  
CCTACAGAAGAAGCACCGGCTAACTCCGTGCCAGCAGCCGCGGTAATACGGAGGGTG  
CGAGCGTTAATCGGAATTACTGGGCGTAAAGCGCATGCAGGCGGCCTGTAAAGTCAG  
ATGTGAAAGCCCGGGGCTTAACCTCGGAATTGCATTTGAAACTGGCAGGCTAGAGTC  
TTGTAGAGGGGGGTAGAATTTACAGGTGTAGCGGTGAAATGCGTAGAGATCTGAAGGA  
ATACCAGTGGCGAAGGCGGCCCCCTGGACAAAGACTGACGCTCAGATGCGAAAGCGT  
GGGGAGCAAACAGGATTAGATACCCTGGTAGTCCACGCCGTAAACGATGTCTACTTG  
GAGGTTGTGGCCTTGAGCCGTGGCTTTCGGAGCTAACGCGTTAAGTAGACCGCCTGG  
GGAGTACGGTCGCAAGATTAAAACTCAAATGAATTGACGGGGGGCCGCACAAGCGGT  
GGAGCATGTGGTTTAATTTCGATGCAACGCGAAGAACCTTACCTACTCTTGACATCCA  
GAGAAGCTTGAAGAGATTTCGAGTGTGCCTTCGGGAACTCTGAGACAGGTGCTGCATG  
GCTGTCTCAGCTCGTGTGTGAAATGTTGGGTAAAGTCCCGCAACGAGCGCAACCCT  
TATCCTTGTTTGGCAGCACTTCGGGTGGGAACTCCAGGGAGACTGCCGGTGATAAAC  
CGGAGGAAGGTGGGGACGACGTCAAGTCATCATGGCCCTTACGAGTAGGGCTACACA  
CGTGCTACAATGGC

>354

GTAATGGCTCACCAAGGCAACGATCCCTAGCTGGTCTGAGAGGATGATCAGCCACAC  
TGGAAGTGAACACGGTCCAGACTCCTACGGGAGGCAGCAGTGGGGAATATTGCACA  
ATGGGGGAAACCCTGATGCAGCCATGCCGCGTGTGTGAAGAAGGCCTTCGGGTGTGA  
AAGCACTTTCAGTAGGGAGGAAGGTAGTGTAGTTAACACCTGCACTATTTGACGTTA  
CCTACAGAAGAAGCACCGGCTAACTCCGTGCCAGCAGCCGCGGTAATACGGAGGGTG  
CGAGCGTTAATCGGAATTACTGGGCGTAAAGCGCATGCAGGCGGCCTGTAAAGTCAG  
ATGTGAAAGCCCGGGGCTTAACCTCGGAATTGCATTTGAAACTGGCAGGCTAGAGTC  
TTGTAGAGGGGGGTAGAATTTACAGGTGTAGCGGTGAAATGCGTAGAGATCTGAAGGA  
ATACCAGTGGCGAAGGCGGCCCCCTGGACAAAGACTGACGCTCAGATGCGAAAGCGT  
GGGGAGCAAACAGGATTAGATACCCTGGTAGTCCACGCCGTAAACGATGTCTACTTG  
GAGGTTGTGGCCTTGAGCCGTGGCTTTCGGAGCTAACGCGTTAAGTAGACCGCCTGG  
GGAGTACGGTCGCAAGATTAAAACTCAAATGAATTGACGGGGGGCCGCACAAGCGGT

GGAGCATGTGGTTTAATTTCGATGCAACGCGAAGAACCTTACCTACTCTTGACATCCA  
GAGAAGCTTGAAGAGATTTCGAGTGTGCCTTCGGGAACTCTGAGACAGGTGCTGCATG  
GCTGTCGTCAGCTCGTGTGTGAAATGTTGGGTAAAGTCCCGCAACGAGCGCAACCCT  
TATCCTTGTTTGCCAGCACTTCGGGTGGGAACTCCAGGGAGACTGCCGGTGATAAAC  
CGGAGGAAGGTGGGGACGACGTCAAGTCATCATGGCCCTTACGAGTAGGGCTACACA  
CGTGCTACAATGGC

>355

GTAATGGCTCACCAAGGCAACGATCCCTAGCTGGTCTGAGAGGATGATCAGCCACAC  
TGGAAGTGAAGACACGGTCCAGACTCCTACGGGAGGCAGCAGTGGGGAATATTGCACA  
ATGGGGGAAACCCTGATGCAGCCATGCCGCGTGTGTGAAGAAGGCCTTCGGGTGTGA  
AAGCACTTTCAGTAGGGAGGAAGGTAGTGTAGTTAACACCTGCACTATTTGACGTTA  
CCTACAGAAGAAGCACCGGCTAACTCCGTGCCAGCAGCCGCGGTAATACGGAGGGTG  
CGAGCGTTAATCGGAATTACTGGGCGTAAAGCGCATGCAGGCGGCCTGTTAAGTCAG  
ATGTGAAAGCCCGGGGCTTAACCTCGGAATTGCATTTGAAACTGGCAGGCTAGAGTC  
TTGTAGAGGGGGGTAGAATTTTCAGGTGTAGCGGTGAAATGCGTAGAGATCTGAAGGA  
ATACCAGTGGCGAAGGCGGCCCCCTGGACAAAGACTGACGCTCAGATGCGAAAGCGT  
GGGGAGCAAACAGGATTAGATACCCTGGTAGTCCACGCCGTAAACGATGTCTACTTG  
GAGGTTGTGGCCTTGAGCCGTGGCTTTCGGAGCTAACGCGTTAAGTAGACCGCCTGG  
GGAGTACGGTCGCAAGATTAAACTCAAATGAATTGACGGGGGGCCCGCACAAAGCGGT  
GGAGCATGTGGTTTAATTTCGATGCAACGCGAAGAACCTTACCTACTCTTGACATCCA  
GAGAAGCTTGAAGAGATTTCGAGTGTGCCTTCGGGAACTCTGAGACAGGTGCTGCATG  
GCTGTCGTCAGCTCGTGTGTGAAATGTTGGGTAAAGTCCCGCAACGAGCGCAACCCT  
TATCCTTGTTTGCCAGCACTTCGGGTGGGAACTCCAGGGAGACTGCCGGTGATAAAC  
CGGAGGAAGGTGGGGACGACGTCAAGTCATCATGGCCCTTACGAGTAGGGCTACACA  
CGTGCTACAATGGC

>367

GTAATGGCTCACCAAGGCAACGATCCCTAGCTGGTCTGAGAGGATGATCAGCCACAC  
TGGAAGTGAAGACACGGTCCAGACTCCTACGGGAGGCAGCAGTGGGGAATATTGCACA  
ATGGGGGAAACCCTGATGCAGCCATGCCGCGTGTGTGAAGAAGGCCTTCGGGTGTGA  
AAGCACTTTCAGTAGGGAGGAAGGTAGTGTAGTTAACACCTGCATTATTTGACGTTA  
CCTACAGAAGAAGCACCGGCTAACTCCGTGCCAGCAGCCGCGGTAATACGGAGGGTG  
CGAGCGTTAATCGGAATTACTGGGCGTAAAGCGCATGCAGGCGGCCTGTTAAGTCAG  
ATGTGAAAGCCCGGGGCTTAACCTCGGAATTGCATTTGAAACTGGCAGGCTAGAGTC  
TTGTAGAGGGGGGTAGAATTTTCAGGTGTAGCGGTGAAATGCGTAGAGATCTGAAGGA  
ATACCAGTGGCGAAGGCGGCCCCCTGGACAAAGACTGACGCTCAGATGCGAAAGCGT  
GGGGAGCAAACAGGATTAGATACCCTGGTAGTCCACGCCGTAAACGATGTCTACTTG  
GAGGTTGTGGCCTTGAGCCGTGGCTTTCGGAGCTAACGCGTTAAGTAGACCGCCTGG  
GGAGTACGGTCGCAAGATTAAACTCAAATGAATTGACGGGGGGCCCGCACAAAGCGGT  
GGAGCATGTGGTTTAATTTCGATGCAACGCGAAGAACCTTACCTACTCTTGACATCCA  
GAGAAGCTTGAAGAGATTTCGAGTGTGCCTTCGGGAACTCTGAGACAGGTGCTGCATG  
GCTGTCGTCAGCTCGTGTGTGAAATGTTGGGTAAAGTCCCGCAACGAGCGCAACCCT  
TATCCTTGTTTGCCAGCACTTCGGGTGGGAACTCCAGGGAGACTGCCGGTGATAAAC  
CGGAGGAAGGTGGGGACGACGTCAAGTCATCATGGCCCTTACGAGTAGGGCTACACA  
CGTGCTACAATGGC

>371

GTAATGGCTCACCAAGGCAACGATCCCTAGCTGGTCTGAGAGGATGATCAGCCACAC  
TGGAAGTGAACACGGTCCAGACTCCTACGGGAGGCAGCAGTGGGGAATATTGCACA  
ATGGGGGAAACCCTGATGCAGCCATGCCGCGTGTGTGAAGAAGGCCTTCGGGTTGTA  
AAGCACTTTTCAGTAGGGAGGAAGGTAGTGTAGTTAACACCTGCACTATTTGACGTTA  
CCTACAGAAGAAGCACCGGCTAACTCCGTGCCAGCAGCCGCGGTAATACGGAGGGTG  
CGAGCGTTAATCGGAATTACTGGGCGTAAAGCGCATGCAGGCGGCCTGTTAAGTCAG  
ATGTGAAAGCCCGGGGCTTAACCTCGGAATTGCATTTGAAACTGGCAGGCTAGAGTC  
TTGTAGAGGGGGGTAGAATTTTCAGGTGTAGCGGTGAAATGCGTAGAGATCTGAAGGA  
ATACCAGTGGCGAAGGCGGCCCCCTGGACAAAGACTGACGCTCAGATGCGAAAGCGT  
GGGGAGCAAACAGGATTAGATACCCTGGTAGTCCACGCGGTAAACGATGTCTACTTG  
GAGGTTGTGGCCTTGAGCCGTGGCTTTCGGAGCTAACGCGTTAAGTAGACCGCCTGG  
GGAGTACGGTCGCAAGATTA AAACTCAAATGAATTGACGGGGGCCCCGCACAAGCGGT  
GGAGCATGTGGTTTAATTCGATGCAACGCGAAGAACCTTACCTACTCTTGACATCCA  
GAGAAGCTTGAAGAGATTTCGAGTGTGCCTTCGGGAACCTCTGAGACAGGTGCTGCATG  
GCTGTCTGTCAGCTCGTGTGTGAAATGTTGGGTAAAGTCCCGCAACGAGCGCAACCCT  
TATCCTTGTTTGGCAGCACTTCGGGTGGGAACCTCCAGGGAGACTGCCGGTGATAAAC  
CGGAGGAAGGTGGGGACGACGTCAAGTCATCATGGCCCTTACGAGTAGGGCTACACA  
CGTGCTACAATGGC

>399

GTAATGGCTCACCAAGGCAACGATCCCTAGCTGGTCTGAGAGGATGATCAGCCACAC  
TGGAAGTGAACACGGTCCAGACTCCTACGGGAGGCAGCAGTGGGGAATATTGCACA  
ATGGGGGAAACCCTGATGCAGCCATGCCGCGTGTGTGAAGAAGGCCTTCGGGTTGTA  
AAGCACTTTTCAGTAGGGAGGAAGGTAGTGTAGTTAACACCTGCACTATTTGACGTTA  
CCTACAGAAGAAGCACCGGCTAACTCCGTGCCAGCAGCCGCGGTAATACGGAGGGTG  
CGAGCGTTAATCGGAATTACTGGGCGTAAAGCGCATGCAGGCGGCCTGTTAAGTCAG  
ATGTGAAAGCCCGGGGCTTAACCTCGGAATTGCATTTGAAACTGGCAGGCTAGAGTC  
TTGTAGAGGGGGGTAGAATTTTCAGGTGTAGCGGTGAAATGCGTAGAGATCTGAAGGA  
ATACCAGTGGCGAAGGCGGCCCCCTGGACAAAGACTGACGCTCAGATGCGAAAGCGT  
GGGGAGCAAACAGGATTAGATACCCTGGTAGTCCACGCGGTAAACGATGTCTACTTG  
GAGGTTGTGGCCTTGAGCCGTGGCTTTCGGAGCTAACGCGTTAAGTAGACCGCCTGG  
GGAGTACGGTCGCAAGATTA AAACTCAAATGAATTGACGGGGGCCCCGCACAAGCGGT  
GGAGCATGTGGTTTAATTCGATGCAACGCGAAGAACCTTACCTACTCTTGACATCCA  
GAGAAGCTTGAAGAGATTTCGAGTGTGCCTTCGGGAACCTCTGAGACAGGTGCTGCATG  
GCTGTCTGTCAGCTCGTGTGTGAAATGTTGGGTAAAGTCCCGCAACGAGCGCAACCCT  
TATCCTTGTTTGGCAGCACTTCGGGTGGGAACCTCCAGGGAGACTGCCGGTGATAAAC  
CGGAGGAAGGTGGGGACGACGTCAAGTCATCATGGCCCTTACGAGTAGGGCTACACA  
CGTGCTACAATGGC

>400

GTAATGGCTCACCAAGGCAACGATCCCTAGCTGGTCTGAGAGGATGATCAGCCACAC  
TGGAAGTGAACACGGTCCAGACTCCTACGGGAGGCAGCAGTGGGGAATATTGCACA  
ATGGGGGAAACCCTGATGCAGCCATGCCGCGTGTGTGAAGAAGGCCTTCGGGTTGTA  
AAGCACTTTTCAGTAGGGAGGAAGGTAGTGTAGTTAACACCTGCACTATTTGACGTTA  
CCTACAGAAGAAGCACCGGCTAACTCCGTGCCAGCAGCCGCGGTAATACGGAGGGTG

CGAGCGTTAATCGGAATTACTGGGCGTAAAGCGCATGCAGGCGGCCTGTTAAGTCAG  
ATGTGAAAGCCCGGGGCTTAACCTCGGAATTGCATTTGAAACTGGCAGGCTAGAGTC  
TTGTAGAGGGGGGTAGAATTTACAGGTGTAGCGGTGAAATGCGTAGAGATCTGAAGGA  
ATACCACTGGCGAAGGCGGCCCCCTGGACAAAGACTGACGCTCAGATGCGAAAGCGT  
GGGGAGCAAACAGGATTAGATACCCTGGTAGTCCACGCCGTAAACGATGTCTACTTG  
GAGGTTGTGGCCTTGAGCCGTGGCTTTCGGAGCTAACGCGTTAAGTAGACCGCCTGG  
GGAGTACGGTCGCAAGATTAAAACTCAAATGAATTGACGGGGGGCCCGCACAAAGCGGT  
GGAGCATGTGGTTTAATTTCGATGCAACGCGAAGAACCTTACCTACTCTTGACATCCA  
GAGAAGCTTGAAGAGATTTCGAGTGTGCCTTCGGGAACTCTGAGACAGGTGCTGCATG  
GCTGTCTCAGCTCGTGTGTGAAATGTTGGGTAAAGTCCCGCAACGAGCGCAACCCT  
TATCCTTGTTTGGCAGCACTTCGGGTGGGAACTCCAGGGAGACTGCCGGTGATAAAC  
CGGAGGAAGGTGGGGACGACGTCAAGTCATCATGGCCCTTACGAGTAGGGCTACACA  
CGTGCTACAATGGC

>405

GTAATGGCTCACCAAGGCAACGATCCCTAGCTGGTCTGAGAGGATGATCAGCCACAC  
TGGAAGTGAAGACACGGTCCAGACTCCTACGGGAGGCAGCAGTGGGGAATATTGCACA  
ATGGGGGAAACCCTGATGCAGCCATGCCGCGTGTGTGAAGAAGGCCTTCGGGTGTGA  
AAGCACTTTTCAGTAGGGAGGAAGGTAGTGTAGTTAACACCTGCACTATTTGACGTTA  
CCTACAGAAGAAGCACCGGCTAACTCCGTGCCAGCAGCCGCGGTAATACGGAGGGTG  
CGAGCGTTAATCGGAATTACTGGGCGTAAAGCGCATGCAGGCGGCCTGTTAAGTCAG  
ATGTGAAAGCCCGGGGCTTAACCTCGGAATTGCATTTGAAACTGGCAGGCTAGAGTC  
TTGTAGAGGGGGGTAGAATTTACAGGTGTAGCGGTGAAATGCGTAGAGATCTGAAGGA  
ATACCACTGGCGAAGGCGGCCCCCTGGACAAAGACTGACGCTCAGATGCGAAAGCGT  
GGGGAGCAAACAGGATTAGATACCCTGGTAGTCCACGCCGTAAACGATGTCTACTTG  
GAGGTTGTGGCCTTGAGCCGTGGCTTTCGGAGCTAACGCGTTAAGTAGACCGCCTGG  
GGAGTACGGTCGCAAGATTAAAACTCAAATGAATTGACGGGGGGCCCGCACAAAGCGGT  
GGAGCATGTGGTTTAATTTCGATGCAACGCGAAGAACCTTACCTACTCTTGACATCCA  
GAGAAGCTTGAAGAGATTTCGAGTGTGCCTTCGGGAACTCTGAGACAGGTGCTGCATG  
GCTGTCTCAGCTCGTGTGTGAAATGTTGGGTAAAGTCCCGCAACGAGCGCAACCCT  
TATCCTTGTTTGGCAGCACTTCGGGTGGGAACTCCAGGGAGACTGCCGGTGATAAAC  
CGGAGGAAGGTGGGGACGACGTCAAGTCATCATGGCCCTTACGAGTAGGGCTACACA  
CGTGCTACAATGGC

>406

GTAATGGCTCACCAAGGCAACGATCCCTAGCTGGTCTGAGAGGATGATCAGCCACAC  
TGGAAGTGAAGACACGGTCCAGACTCCTACGGGAGGCAGCAGTGGGGAATATTGCACA  
ATGGGGGAAACCCTGATGCAGCCATGCCGCGTGTGTGAAGAAGGCCTTCGGGTGTGA  
AAGCACTTTTCAGTAGGGAGGAAGGTAGTGTAGTTAACACCTGCACTATTTGACGTTA  
CCTACAGAAGAAGCACCGGCTAACTCCGTGCCAGCAGCCGCGGTAATACGGAGGGTG  
CGAGCGTTAATCGGAATTACTGGGCGTAAAGCGCATGCAGGCGGCCTGTTAAGTCAG  
ATGTGAAAGCCCGGGGCTTAACCTCGGAATTGCATTTGAAACTGGCAGGCTAGAGTC  
TTGTAGAGGGGGGTAGAATTTACAGGTGTAGCGGTGAAATGCGTAGAGATCTGAAGGA  
ATACCACTGGCGAAGGCGGCCCCCTGGACAAAGACTGACGCTCAGATGCGAAAGCGT  
GGGGAGCAAACAGGATTAGATACCCTGGTAGTCCACGCCGTAAACGATGTCTACTTG  
GAGGTTGTGGCCTTGAGCCGTGGCTTTCGGAGCTAACGCGTTAAGTAGACCGCCTGG  
GGAGTACGGTCGCAAGATTAAAACTCAAATGAATTGACGGGGGGCCCGCACAAAGCGGT

GGAGCATGTGGTTTAATTTCGATGCAACGCGAAGAACCTTACCTACTCTTGACATCCA  
GAGAAGCTTGAAGAGATTTCGAGTGTGCCTTCGGGAACCTCTGAGACAGGTGCTGCATG  
GCTGTCTCAGCTCGTGTGTGAAATGTTGGGTAAAGTCCCGCAACGAGCGCAACCCT  
TATCCTTGTTTGGCAGCACTTCGGGTGGGAACCTCCAGGGAGACTGCCGGTGATAAAC  
CGGAGGAAGGTGGGGACGACGTCAAGTCATCATGGCCCTTACGAGTAGGGCTACACA  
CGTGCTACAATGGC

>407

GTAATGGCTCACCAAGGCAACGATCCCTAGCTGGTCTGAGAGGATGATCAGCCACAC  
TGGAACCTGAGACACGGTCCAGACTCCTACGGGAGGCAGCAGTGGGGAATATTGCACA  
ATGGGGGAAACCCTGATGCAGCCATGCCGCGTGTGTGAAGAAGGCCTTCGGGTGTGA  
AAGCACTTTCAGTAGGGAGGAAGGTAGTGTAGTTAACACCTGCACTATTTGACGTTA  
CCTACAGAAGAAGCACCGGCTAACTCCGTGCCAGCAGCCGCGGTAATACGGAGGGTG  
CGAGCGTTAATCGGAATTACTGGGCGTAAAGCGCATGCAGGCGGCCTGTTAAGTCAG  
ATGTGAAAGCCCGGGGCTTAACCTCGGAATTGCATTTGAAACTGGCAGGCTAGAGTC  
TTGTAGAGGGGGGTAGAATTTTCAGGTGTAGCGGTGAAATGCGTAGAGATCTGAAGGA  
ATACCAGTGGCGAAGGCGGCCCCCTGGACAAAGACTGACGCTCAGATGCGAAAGCGT  
GGGGAGCAAACAGGATTAGATACCCTGGTAGTCCACGCCGTAAACGATGTCTACTTG  
GAGGTTGTGGCCTTGAGCCGTGGCTTTCGGAGCTAACGCGTTAAGTAGACCGCCTGG  
GGAGTACGGTCGCAAGATTAAACTCAAATGAATTGACGGGGGGCCCGCACAAAGCGGT  
GGAGCATGTGGTTTAATTTCGATGCAACGCGAAGAACCTTACCTACTCTTGACATCCA  
GAGAAGCTTGAAGAGATTTCGAGTGTGCCTTCGGGAACCTCTGAGACAGGTGCTGCATG  
GCTGTCTCAGCTCGTGTGTGAAATGTTGGGTAAAGTCCCGCAACGAGCGCAACCCT  
TATCCTTGTTTGGCAGCACTTCGGGTGGGAACCTCCAGGGAGACTGCCGGTGATAAAC  
CGGAGGAAGGTGGGGACGACGTCAAGTCATCATGGCCCTTACGAGTAGGGCTACACA  
CGTGCTACAATGGC

>415

GTAATGGCTCACCAAGGCAACGATCCCTAGCTGGTCTGAGAGGATGATCAGCCACAC  
TGGAACCTGAGACACGGTCCAGACTCCTACGGGAGGCAGCAGTGGGGAATATTGCACA  
ATGGGGGAAACCCTGATGCAGCCATGCCGCGTGTGTGAAGAAGGCCTTCGGGTGTGA  
AAGCACTTTCAGTAGGGAGGAAGGTAGTGTAGTTAACACCTGCACTATTTGACGTTA  
CCTACAGAAGAAGCACCGGCTAACTCCGTGCCAGCAGCCGCGGTAATACGGAGGGTG  
CGAGCGTTAATCGGAATTACTGGGCGTAAAGCGCATGCAGGCGGCCTGTTAAGTCAG  
ATGTGAAAGCCCGGGGCTTAACCTCGGAATTGCATTTGAAACTGGCAGGCTAGAGTC  
TTGTAGAGGGGGGTAGAATTTTCAGGTGTAGCGGTGAAATGCGTAGAGATCTGAAGGA  
ATACCAGTGGCGAAGGCGGCCCCCTGGACAAAGACTGACGCTCAGATGCGAAAGCGT  
GGGGAGCAAACAGGATTAGATACCCTGGTAGTCCACGCCGTAAACGATGTCTACTTG  
GAGGTTGTGGCCTTGAGCCGTGGCTTTCGGAGCTAACGCGTTAAGTAGACCGCCTGG  
GGAGTACGGTCGCAAGATTAAACTCAAATGAATTGACGGGGGGCCCGCACAAAGCGGT  
GGAGCATGTGGTTTAATTTCGATGCAACGCGAAGAACCTTACCTACTCTTGACATCCA  
GAGAAGCTTGAAGAGATTTCGAGTGTGCCTTCGGGAACCTCTGAGACAGGTGCTGCATG  
GCTGTCTCAGCTCGTGTGTGAAATGTTGGGTAAAGTCCCGCAACGAGCGCAACCCT  
TATCCTTGTTTGGCAGCACTTCGGGTGGGAACCTCCAGGGAGACTGCCGGTGATAAAC  
CGGAGGAAGGTGGGGACGACGTCAAGTCATCATGGCCCTTACGAGTAGGGCTACACA  
CGTGCTACAATGGC

>417

GTAATGGCTCACCAAGGCAACGATCCCTAGCTGGTCTGAGAGGATGATCAGCCACAC  
TGGAAGTGAACACGGTCCAGACTCCTACGGGAGGCAGCAGTGGGGAATATTGCACA  
ATGGGGGAAACCCTGATGCAGCCATGCCGCGTGTGTGAAGAAGGCCTTCGGGTTGTA  
AAGCACTTTTCAGTAGGGAGGAAGGTAGTGTAGTTAACACCTGCACTATTTGACGTTA  
CCTACAGAAGAAGCACCGGCTAACTCCGTGCCAGCAGCCGCGGTAATACGGAGGGTG  
CGAGCGTTAATCGGAATTACTGGGCGTAAAGCGCATGCAGGCGGCCTGTTAAGTCAG  
ATGTGAAAGCCCGGGGCTTAACCTCGGAATTGCATTTGAAACTGGCAGGCTAGAGTC  
TTGTAGAGGGGGGTAGAATTTTCAGGTGTAGCGGTGAAATGCGTAGAGATCTGAAGGA  
ATACCAGTGGCGAAGGCGGCCCCCTGGACAAAGACTGACGCTCAGATGCCAAAGCGT  
GGGGAGCAAACAGGATTAGATACCCTGGTAGTCCACGCCGTAAACGATGTCTACTTG  
GAGGTTGTGGCCTTGAGCCGTGGCTTTCGGAGCTAACGCGTTAAGTAGACCGCCTGG  
GGAGTACGGTCGCAAGATTAAACTCAAATGAATTGACGGGGGGCCGCACAAGCGGT  
GGAGCATGTGGTTTAATTCGATGCAACGCGAAGAACCTTACCTACTCTTGACATCCA  
GAGAAGCTTGAAGAGATTTCGAGTGTGCCTTCGGGAACTCTGAGACAGGTGCTGCATG  
GCTGTCGTCAGCTCGTGTGTGTGAAATGTTGGGTAAAGTCCCGCAACGAGCGCAACCCT  
TATCCTTGTTTTGCCAGCACTTCGGGTGGGAACTCCAGGGAGACTGCCGGTGATAAAC  
CGGAGGAAGGTGGGGACGACGTCAAGTCATCATGGCCCTTACGAGTAGGGCTACACA  
CGTGCTACAATGGC
